# Supplementary material for: The hepatocyte proteome in organotypic rat liver models and the influence of the local microenvironment
Source: PubMed Central journal article supplement (PMC5480101; doi:10.1186/s12953-017-0120-6), 2017-06-20
Supplement: 12953_2017_120_MOESM1_ESM.pdf [file 12953_2017_120_MOESM1_ESM.pdf]

## SUPPLEMENTAL MATERIALS

### The Hepatocyte Proteome in Organotypic Rat Liver Models and the Influence of the Local Microenvironment

Lucas T. Vu<sup>1</sup>, Sophia M. Orbach<sup>1</sup>, W. Keith Ray<sup>2</sup>, Margaret E. Cassin<sup>1</sup>, Padmavathy Rajagopalan<sup>1,3,4</sup>, Richard F. Helm<sup>2,4\*</sup>

<sup>1</sup>Department of Chemical Engineering, Virginia Tech, Blacksburg, VA

<sup>2</sup>Department of Biochemistry, Virginia Tech, Blacksburg, VA

<sup>3</sup>School of Biomedical Engineering and Sciences, Virginia Tech, Blacksburg, VA

<sup>4</sup>ICTAS Center for Systems Biology and Engineered Tissues, Virginia Tech, Blacksburg, VA

Corresponding Author: Richard F. Helm ([helmrf@vt.edu](mailto:helmrf@vt.edu))

### Table of Contents

|                  |                                                                                                                       |   |
|------------------|-----------------------------------------------------------------------------------------------------------------------|---|
| <b>Figure S1</b> | Protein lists for the pairwise comparison of the three constructs. (A) 3DHL vs. 3DH, (B) 3DHL vs. HM, (C) 3DH vs. HM. | 2 |
| <b>Table S1</b>  | Sample to Sample Pearson Correlations for Technical and Biological Replicates.                                        | 5 |
| <b>Table S2</b>  | DAVID Analysis of Enriched KEGG pathways.                                                                             | 6 |
| <b>Figure S2</b> | Peroxisomal processes are modulated by PEMs and LSECs.                                                                | 8 |

**Hepatocyte Proteome Data:** ProteomeXchange Consortium via the PRIDE partner repository with the dataset identifier PXD002491.

Website: <https://www.ebi.ac.uk/pride/archive/login>

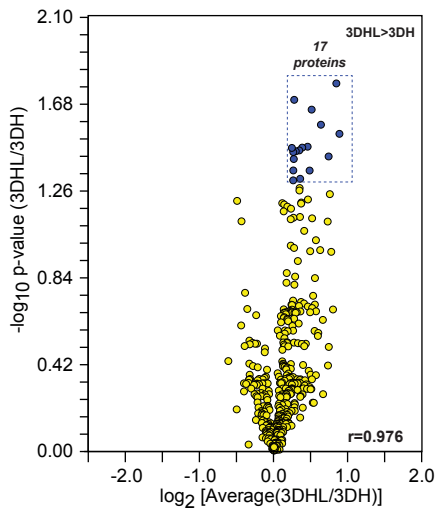

#### Protein Description

40S ribosomal protein S17, GN=Rps17  
 78 kDa glucose-regulated protein GN=Hspa5  
 Calnexin GN=Canx  
 Carboxylesterase 1D GN=Ces1d  
 Carboxylesterase 4 (Liver) (EST4\_RAT)  
 Carboxylesterase B-1 (Liver) (EST5\_RAT)  
 Cytochrome P450 2A1 GN=Cyp2a1  
 Cytochrome P450 2C12, female-specific GN=LOC100361492  
 Endoplasmic reticulum resident protein 29 GN=Erp29  
 Glycine N-acyltransferase GN=Glyat  
 Peptidyl-prolyl cis-trans isomerase B GN=Ppib  
 Protein disulfide-isomerase A4 GN=Pdia4  
 Protein disulfide-isomerase GN=P4hb  
 Rab GDP dissociation inhibitor beta GN=Gdi2  
 Thioredoxin GN=Txn  
 UDP-glucuronosyltransferase 1-6 GN=Ugt1a6  
 Voltage-dependent anion-selective channel protein 1 GN=Vdac1

#### UniProt ID

D3ZFA8\*  
 P06761  
 P35565  
 P16303  
 Q64573  
 Q63010  
 P11711  
 Q64648  
 P52555  
 Q5PQT3  
 P24368  
 P38659  
 P04785  
 P50399  
 P11232  
 P08430  
 Q9Z2L0

**Fig S1A. Protein list for the pairwise comparison of 3DHL vs. 3DH.** The original figure from the manuscript is shown (Fig. 3A). Protein descriptions are as provided by the UniProt ID, with the exception of those with an asterisk (\*). These proteins were manually annotated by a BLAST search of the originally identified protein. For example, D3ZFA8 was computationally identified as “Protein LOC100362366 OS=Rattus norvegicus GN=LOC100364909 PE=3 SV=1”. This sequence was used in a BLAST search to identify identical proteins (>95 %) in the rat or murine database. The protein description for that protein was then inserted but keeping the original UniProt ID.

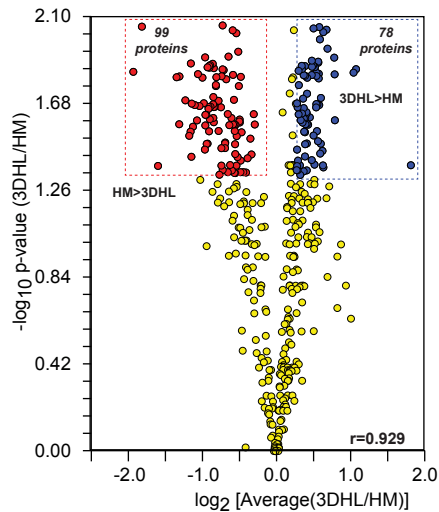

**Fig S1B. Protein list for the pairwise comparison of 3DHL vs. HM.** The original figure from the manuscript is shown (Fig. 3B). Protein UniProt Accessions with an asterisk (\*) were manually annotated using the results of a BLAST search of the originally identified protein (See Fig. S1A for details).

### 3DHL abundance > HM (Blue)

**Protein Description**  
 10-formyltetrahydrofolate dehydrogenase GN=Aldh112  
 2,4-dienoyl-CoA reductase, mitochondrial GN=Decr1  
 3-ketoacyl-CoA thiolase A, peroxisomal GN=Acaa1a  
 3-ketoacyl-CoA thiolase, mitochondrial GN=Acaa2  
 3-oxo-5-alpha-steroid 4-dehydrogenase 1 (Fragment) GN=Srd5a1  
 4-nitrophenylphosphatase domain/non-neuronal SNAP25-like protein homolog 1 GN=Nipsnap1  
 Acyl-CoA synthetase family member 2, mitochondrial GN=Acsf2  
 Acyl-CoA synthetase short-chain family member 3, mitochondrial GN=Aacs3  
 Acyl-Coenzyme A dehydrogenase, very long chain GN=Acadv1  
 Acyl-coenzyme A oxidase GN=Acox1  
 Acyl-coenzyme A synthetase ACSM5, mitochondrial GN=Aacsm5  
 Adipocyte plasma membrane-associated protein GN=Apmmap  
 Agmatinase, mitochondrial GN=Agmtat  
 Aldehyde dehydrogenase family 6, subfamily A1, isoform CRA\_b GN=Aldh6a1  
 Aldehyde dehydrogenase X, mitochondrial GN=Aldh1b1  
 Alpha-aminoacidic semialdehyde dehydrogenase GN=Aldh7a1  
 Alpha-aminoacidic semialdehyde synthase, mitochondrial GN=Aass  
 Alpha-methylacyl-CoA racemase GN=Amacr  
 ATP synthase subunit O, mitochondrial GN=Atp5o  
 Bile acid-CoA:amino acid N-acyltransferase GN=Baat  
 Biphenyl hydrolase-like (Serine hydrolase) GN=Bphl  
 Carboxylesterase 1D GN=Ces1d  
 Carboxylesterase 1E GN=Ces1e  
 Catalase GN=Cat  
 Choline dehydrogenase, mitochondrial GN=Chdh  
 Dihydroliipoamide S-succinyltransferase (E2 component of 2-oxo-glutarate complex) GN=Dlst  
 Dihydroliipoil dehydrogenase, mitochondrial GN=Dld  
 Dimethylglycine dehydrogenase, mitochondrial GN=Dmgdh  
 Dolichyl-diphosphooligosaccharide--protein glycosyltransferase 48 kDa subunit GN=DDost  
 Dolichyl-diphosphooligosaccharide--protein glycosyltransferase subunit 1 GN=Rpn1  
 Ectonucleoside triphosphate diphosphohydrolase 5 GN=Entpd5  
 Electron transfer flavoprotein subunit alpha, mitochondrial GN=Etfa  
 Electron transfer flavoprotein subunit beta GN=Etfb  
 Elongation factor Tu, mitochondrial GN=Tufm  
 Enoyl-CoA delta isomerase 1, mitochondrial GN=Eci1  
 Enoyl-CoA delta isomerase 2, mitochondrial GN=Eci2  
 Enoyl-CoA hydratase domain-containing protein 3, mitochondrial GN=Echdc3  
 Enoyl-CoA hydratase, mitochondrial GN=Echs1  
 Fumarylacetoacetate hydrolase domain-containing protein 2 GN=Fah2  
 Glutamate dehydrogenase 1, mitochondrial GN=Glud1  
 Glutaryl-Coenzyme A dehydrogenase (Predicted) GN=Gcdh  
 Glutathione S-transferase kappa 1 GN=Gstk1  
 Glycine N-acyltransferase GN=Glyat  
 GTP:AMP phosphotransferase AK4, mitochondrial GN=Ak4  
 Haloacid dehalogenase-like hydrolase domain containing 3 GN=Hdh3  
 Hydroxyacid oxidase 1 GN=Hao1  
 Hydroxyacyl-coenzyme A dehydrogenase, mitochondrial GN=Hadh  
 Hydroxymethylglutaryl-CoA lyase, mitochondrial GN=Hmgcl  
 Isovaleryl-CoA dehydrogenase, mitochondrial GN=Ivd  
 Kynurenine--oxoglutarate transaminase 3 GN=Ccbl2  
 Kynurenine/alpha-aminoacidate aminotransferase, mitochondrial GN=Aadat  
 Liver carboxylesterase 4  
 Liver carboxylesterase B-1  
 Long-chain-fatty-acid--CoA ligase 5 GN=Acs15  
 Methylcrotonoyl-CoA carboxylase beta chain, mitochondrial GN=Mccc2  
 Microsomal triglyceride transfer protein GN=Mtgp  
 MOSC domain-containing protein 2, mitochondrial GN=Marc2  
 NADH dehydrogenase [ubiquinone] 1 alpha subcomplex subunit 9, mitochondrial GN=Ndufa9  
 NADH dehydrogenase [ubiquinone] iron-sulfur protein 2, mitochondrial GN=Ndufs2  
 Non-specific lipid-transfer protein GN=Scp2  
 Ornithine aminotransferase, mitochondrial GN=Oat  
 Peroxiredoxin-4 GN=Prdx4  
 Peroxisomal bifunctional enzyme GN=Ehhadh  
 Peroxisomal multifunctional enzyme type 2 GN=Hsd17b4  
 Probable 2-oxoglutarate dehydrogenase E1 component DHKTD1, mitochondrial GN=Dhtkd1  
 Protein disulfide-isomerase A6 GN=Pdia6  
 Sarcosine dehydrogenase, mitochondrial GN=Sardh  
 Short/branched chain specific acyl-CoA dehydrogenase, mitochondrial GN=Acad5b  
 Succinate dehydrogenase [ubiquinone] iron-sulfur subunit, mitochondrial GN=Sdhb  
 Succinyl-CoA ligase subunit beta GN=Succ2a  
 Succinyl-CoA ligase subunit beta GN=Succ2b  
 Sulfated glycoprotein 1 GN=Pspap  
 Taste receptor type 1 member 2 GN=Tas1r2  
 Trifunctional enzyme subunit alpha, mitochondrial GN=Hadha  
 Trifunctional enzyme subunit beta, mitochondrial GN=Hadhb  
 UDP-glucuronosyltransferase 1-6 GN=Ugt1a6  
 UDP-glucuronosyltransferase 2B15 GN=Ugt2b15  
 UDP-glucuronosyltransferase Ugt2b10 GN=Ugt2b10

### HM abundance > 3DHL (Red)

**Protein Description**  
 14-3-3 protein zeta/delta GN=Ywhaz  
 40S ribosomal protein S12 GN=LOC100360573  
 40S ribosomal protein S15 GN=Rps15  
 40S ribosomal protein S18 (Fragment) GN=LOC100912024  
 40S ribosomal protein S19 GN=LOC100362339  
 40S ribosomal protein S24 GN=LOC100363469  
 40S ribosomal protein S25 (Fragment) GN=RGD1564597  
 40S ribosomal protein S28 GN=Rps28  
 40S ribosomal protein S3 GN=Rps3  
 40S ribosomal protein S3a GN=LOC100365839  
 40S ribosomal protein S4, X isoform GN=Rps4x  
 40S ribosomal protein S7 GN=Rps7  
 40S ribosomal protein S8 GN=Rps8  
 40S ribosomal protein SA GN=Rpsa  
 6-phosphogluconate dehydrogenase, decarboxylating GN=Pgd  
 6S acidic ribosomal protein P2 GN=LOC498555  
 60S ribosomal protein L11 GN=Rpl11  
 60S ribosomal protein L12 GN=Rpl12  
 60S ribosomal protein L13 GN=LOC100360491  
 60S ribosomal protein L17 GN=Rpl17  
 60S ribosomal protein L18 GN=Rpl18  
 60S ribosomal protein L23 GN=Rpl23  
 60S ribosomal protein L23a GN=LOC689899  
 60S ribosomal protein L24 GN=Rpl24  
 60S ribosomal protein L4 GN=Rpl4  
 60S ribosomal protein L6 GN=Rpl6  
 60S ribosomal protein L7 GN=Rpl7  
 60S ribosomal protein L7a (Fragment) GN=LOC100910109  
 60S ribosomal protein L9 (Fragment) GN=RGD1561928  
 Actin, alpha cardiac muscle 1 GN=Actc1  
 Actin, cytoplasmic 1 GN=Actb  
 Adenosylhomocysteinase GN=Ahcy  
 Alcohol dehydrogenase [NADP(+)] GN=Akr1a1  
 Alcohol dehydrogenase 1 GN=Adh1  
 Alpha-enolase GN=Eno1  
 Annexin A2 GN=Anxa2  
 Annexin A5 GN=Anxa5  
 Apolipoprotein E GN=ApoE  
 Apoptosis-inducing factor 1, mitochondrial GN=Aifm1  
 Arginase-1 GN=Arg1  
 Argininosuccinate synthase GN=Ass1  
 Betaine--homocysteine S-methyltransferase 1 GN=Bhmt  
 Calmodulin GN=Calm1  
 CAR-g-binding factor A GN=Hnnpab  
 Catechol O-methyltransferase GN=Comt  
 Cathepsin B GN=Ctsb  
 Chaperonin containing Tcp1, subunit 6A (Zeta 1) GN=Cct6a  
 Cofilin-1 GN=Cfl1  
 Cytosol aminopeptidase GN=Lap3  
 D-dopachrome decarboxylase GN=DDT  
 Elongation factor 1-alpha 1 GN=Eef1a1  
 Elongation factor 2 GN=Eef2  
 Eukaryotic translation elongation factor 1 beta 2 GN=Eef1b2  
 Filamin alpha GN=Flna  
 Fructose-1,6-bisphosphatase 1 GN=Fbp1  
 Fructose-bisphosphate aldolase GN=Aldob  
 Fructose-bisphosphate aldolase A GN=Aldoa  
 Fumarylacetoacetase GN=Fah  
 Glucose-6-phosphate isomerase GN=Gpi  
 Glutathione S-transferase Mu 1 GN=Gstm1  
 Glutathione S-transferase Mu 2 GN=Gstm2  
 Glycerol-3-phosphate dehydrogenase [NAD(+)], cytoplasmic GN=Gpd1  
 Heat shock protein HSP 90-beta GN=Hsp90ab1  
 Heterogeneous nuclear ribonucleoprotein A3 GN=Hnrnpa3  
 Heterogeneous nuclear ribonucleoproteins A2/B1 GN=Hnrnpa2b1  
 Histone H1.4 GN=Hist1h1e  
 Histone H3 GN=RGD1564447  
 Keratin, type I cytoskeletal 18 GN=Krt18  
 Keratin, type II cytoskeletal 8 GN=Krt8  
 Leucine-rich repeat-containing protein 59 GN=Lrrc59  
 Malate dehydrogenase, cytoplasmic GN=Mdh1  
 Myosin light polypeptide 6 GN=Myl6  
 Myosin regulatory light chain RLC-A GN=Rlc-a  
 Myosin-14 GN=Myl14  
 Myosin, heavy polypeptide 9, non-muscle GN=LOC100911597  
 Nucleophosmin GN=Npm1  
 Nucleoside diphosphate kinase B GN=Nme2  
 Peptidyl-prolyl cis-trans isomerase A GN=Ppia  
 Peroxiredoxin-6 GN=Prdx6  
 Peroxisomal trans-2-enoyl-CoA reductase GN=Pecr  
 Phosphate carrier protein, mitochondrial GN=Slc25a3  
 Phosphatidylethanolamine-binding protein 1 GN=Pepp1  
 Phosphoglycerate kinase 1 GN=Pgk1  
 Profilin-1 GN=Pfn1  
 Prostaglandin reductase 1 GN=Ptgr1  
 Pyruvate kinase isozymes R/L GN=Pklr  
 Rab GDP dissociation inhibitor beta GN=Gdi2  
 S-adenosylmethionine synthase isoform type-1 GN=Mat1a  
 Selenine-binding protein 1 (Fragment) GN=Selenbp1  
 Serine/arginine-rich splicing factor 3 GN=Srsf3  
 Serum albumin GN=Alb  
 T-complex protein 1 subunit gamma GN=Cct3  
 Thioredoxin GN=Txn  
 Transgelin-2 GN=Tagln2  
 Transitional endoplasmic reticulum ATPase GN=Vcp  
 Transketolase GN=Tkt  
 Triosephosphate isomerase GN=Tpi1  
 Tropomyosin alpha-3 chain GN=Tpm3  
 Tropomyosin alpha-4 chain GN=Tpm4

**UniProt ID**  
 P63102  
 D3ZHB3  
 P62845  
 MOR5K9\*  
 D4A6G6\*  
 D4ACJ1  
 F1M6F4\*  
 P62859  
 P62909  
 MOR6L4  
 P62703  
 P62083  
 P62243  
 P38983  
 P85968  
 D4A4D5\*  
 P62914  
 P23358  
 D3ZRM9  
 P24049  
 P12001  
 P62832  
 D3ZTH8\*  
 P83732  
 Q6P3V9  
 H7C5V5  
 P05426  
 F1M013\*  
 F1M7A9\*  
 P68035  
 P60711  
 P10760  
 P51635  
 P06757  
 Q04764  
 Q07936  
 P14668  
 P02650  
 Q9JIM53  
 P07824  
 P09034  
 O09171  
 P62161  
 Q9QX80  
 P22734  
 P00787  
 Q3MH59  
 P45592  
 Q68F54  
 M08254  
 P62630  
 P05197  
 B5D5EN  
 COJPT7  
 P19112  
 Q66HT1  
 P05065  
 F1M6W1  
 Q6P6V0  
 P04905  
 P08010  
 O35077  
 P34058  
 Q6URK4  
 F1LM82  
 P55865  
 D3ZK97  
 Q5BJY9  
 Q10758  
 Q5RJR8  
 O88989  
 Q64119  
 P13832  
 F1LNF0  
 G3V6P7  
 P13084  
 P19804  
 P10111  
 O35244  
 Q9WVK3  
 G3V741  
 P31044  
 P16617  
 P62963  
 P97584  
 P12928  
 P50399  
 P13444  
 F1LRJ9  
 Q0ZF58  
 P02770  
 Q6P502  
 P11232  
 Q5XF0  
 P46462  
 P50137  
 P48500  
 Q63610  
 P09495

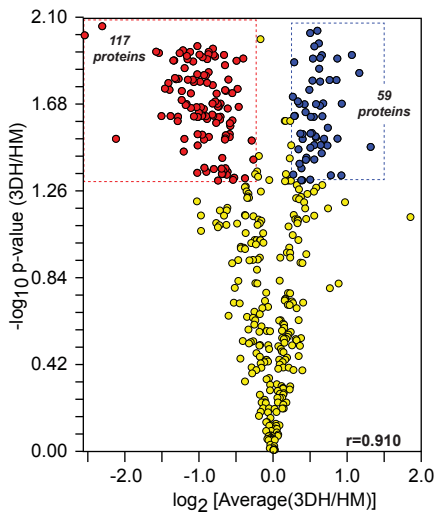

### 3DH protein abundance > HM (Blue)

| Protein Description                                                                    | UniProt ID |
|----------------------------------------------------------------------------------------|------------|
| 10-formyltetrahydrofolate dehydrogenase GN=Aldh1l2                                     | D3ZTP0     |
| 2,4-dienoyl-CoA reductase, mitochondrial GN=Decr1                                      | Q64591     |
| 3-hydroxyacyl-CoA dehydrogenase type-2 GN=Hsd17b10                                     | B0BMW2     |
| 3-ketoacyl-CoA thiolase A, peroxisomal GN=Acaa1a                                       | P21775     |
| 4-aminobutyrate aminotransferase, mitochondrial GN=Abat                                | P50554     |
| 4-nitrophenylphosphatase domain/non-neuronal SNAP25-like protein homolog 1 GN=Nipsnap1 | G3V728     |
| 60 kDa heat shock protein, mitochondrial GN=Hspd1                                      | P63039     |
| Acyl-CoA dehydrogenase family member 11 GN=Acad11                                      | B3DMA2     |
| Acyl-CoA synthetase family member 2, mitochondrial GN=Acscf2                           | Q499N5     |
| Acyl-coenzyme A oxidase GN=Acocx1                                                      | F1LQC1     |
| Acyl-coenzyme A oxidase GN=Acocx3                                                      | F1M9A7     |
| Acyl-coenzyme A synthetase ACSM5, mitochondrial GN=Acsm5                               | Q6AYT9     |
| Adipocyte plasma membrane-associated protein GN=Apmap                                  | Q7TP48     |
| Agmatinase, mitochondrial GN=Agmat                                                     | Q0D2L3     |
| Aldehyde dehydrogenase family 6, subfamily A1 GN=Aldh6a1                               | G3V7J0     |
| Aldehyde dehydrogenase X, mitochondrial GN=Aldh1b1                                     | G3V7I5     |
| Alpha-aminoadipic semialdehyde dehydrogenase GN=Aldh7a1                                | Q64057     |
| Alpha-aminoadipic semialdehyde synthase, mitochondrial GN=Aass                         | D4ACE9     |
| ATP synthase subunit O, mitochondrial GN=Atpsd1                                        | Q06647     |
| Bile acid-CoA:amino acid N-acyltransferase GN=Baat                                     | Q63276     |
| Carboxylesterase 1E GN=Ces1e                                                           | Q63108     |
| Catalase GN=Cat                                                                        | P04762     |
| D-beta-hydroxybutyrate dehydrogenase, mitochondrial GN=Bdh1                            | P29147     |
| Dimethylaniline monoxygenase [N-oxide-forming] 5 GN=Fmo5                               | Q8K4C0     |
| Dimethylglycine dehydrogenase, mitochondrial GN=Dmgdh                                  | Q63342     |
| Electron transfer flavoprotein subunit alpha, mitochondrial GN=Etfa                    | P13803     |
| Electron transfer flavoprotein subunit beta GN=Etfb                                    | Q68FU3     |
| Elongation factor Tu, mitochondrial GN=Turm                                            | P85834     |
| Enoyl-CoA delta isomerase 2, mitochondrial GN=Eci2                                     | Q5XIC0     |
| Ethylmalonic encephalopathy 1 GN=Ethe1                                                 | B0BNJ4     |
| Fatty acid synthase GN=Fasn                                                            | P12785     |
| Glucosidase 2 subunit beta GN=Prkcsb                                                   | B1WC34     |
| Glutaryl-Coenzyme A dehydrogenase (Predicted) GN=Gcdh                                  | D3ZT90     |
| Glutathione S-transferase kappa 1 GN=Gstk1                                             | P24473     |
| GTP:AMP phosphotransferase AK4, mitochondrial GN=Ak4                                   | Q9WUJ0     |
| Haloacid dehalogenase-like hydrolase domain containing 3 GN=Hdhc3                      | B2RYT7     |
| Heterogeneous nuclear ribonucleoprotein K GN=Hnrpk                                     | P61980     |
| Hydroxyacid oxidase 1 GN=Hao1                                                          | B0BNF9     |
| Isovaleryl-CoA dehydrogenase, mitochondrial GN=Ivd                                     | P12007     |
| Kynurenine/alpha-aminoadipate aminotransferase, mitochondrial GN=Aadat                 | Q64602     |
| Long-chain-fatty-acid-CoA ligase 5 GN=Acsl5                                            | O88813     |
| NADH dehydrogenase [ubiquinone] 1 a-subcomplex subunit 9, mitochondrial GN=Ndufa9      | Q5BK63     |
| Nicotinamide nucleotide transhydrogenase GN=Nnt                                        | Q5BJZ3     |
| Non-specific lipid-transfer protein GN=Scp2                                            | P11915     |
| Ornithine aminotransferase, mitochondrial GN=Oat                                       | P04182     |
| Peroxisomal bifunctional enzyme GN=Ehhadh                                              | P07896     |
| Peroxisomal multifunctional enzyme type 2 GN=Hsd17b4                                   | P97852     |
| Probable 2-oxoglutarate dehydrogenase E1 component DHKTD1, mitochondrial GN=Dhtkd1     | Q4KLP0     |
| Sarcosine dehydrogenase, mitochondrial GN=Sardh                                        | Q64380     |
| Serine hydroxymethyltransferase GN=Shmt2                                               | Q5U3Z7     |
| Short-chain specific acyl-CoA dehydrogenase, mitochondrial GN=Acads                    | P15651     |
| Short/branched chain specific acyl-CoA dehydrogenase, mitochondrial GN=Acadsb          | P70584     |
| Sterol 26-hydroxylase, mitochondrial GN=Cyp27a1                                        | P17178     |
| Succinyl-CoA ligase subunit beta GN=Sucla2                                             | F1LM47     |
| Taste receptor type 1 member 2 GN=Tas1r2                                               | F8WF10     |
| Trifunctional enzyme subunit beta, mitochondrial GN=Hadhb                              | Q60587     |
| UDP-glucuronosyltransferase 2B15 GN=Ugt2b15                                            | P36511     |
| UDP-glucuronosyltransferase 2B2 GN=Ugt2b15                                             | F1LM22     |
| Very long-chain acyl-CoA synthetase GN=Slc27a2                                         | P97524     |

### HM abundance > 3DH (Red)

| Protein Description                                              | UniProt ID |
|------------------------------------------------------------------|------------|
| 14-3-3 protein zeta/delta GN=Ywhaz                               | P63102     |
| 2-oxoglutarate dehydrogenase, mitochondrial GN=Ogdh              | Q5X178     |
| 3-alpha-hydroxysteroid dehydrogenase GN=Akr1c9                   | P23457     |
| 40S ribosomal protein S12 GN=LOC100360573                        | D3ZHB3     |
| 40S ribosomal protein S15 GN=Rps15                               | P62845     |
| 40S ribosomal protein S17 GN=LOC100364909                        | D3ZFA8*    |
| 40S ribosomal protein S19 GN=LOC100362339                        | D4A6G6*    |
| 40S ribosomal protein S24 GN=LOC100363469                        | D4ACJ1     |
| 40S ribosomal protein S25 (Fragment) GN=RGD1564597               | F1M6F4*    |
| 40S ribosomal protein S28 GN=Rps28                               | P62859     |
| 40S ribosomal protein S3 GN=Rps3                                 | P62909     |
| 40S ribosomal protein S4, X isoform GN=Rps4x                     | P62703     |
| 40S ribosomal protein S6 (Fragment) GN=Rps6                      | MORD75     |
| 40S ribosomal protein S7 GN=Rps7                                 | P62083     |
| 40S ribosomal protein S8 GN=Rps8                                 | P62243     |
| 40S ribosomal protein SA GN=Rpsa                                 | P38983     |
| 6-phosphogluconate dehydrogenase, decarboxylating GN=Pgd         | P85968     |
| 60S acidic ribosomal protein P2 GN=LOC498555                     | D4A4D5*    |
| 60S ribosomal protein L11 GN=Rpl11                               | P62914     |
| 60S ribosomal protein L12 GN=Rpl12                               | P23358     |
| 60S ribosomal protein L13 GN=LOC100360491                        | D3ZRM9     |
| 60S ribosomal protein L17 GN=Rpl17                               | P24049     |
| 60S ribosomal protein L23 GN=Rpl23                               | P62832     |
| 60S ribosomal protein L23a GN=LOC689899                          | D3ZTH8*    |
| 60S ribosomal protein L24 GN=Rpl24                               | P83732     |
| 60S ribosomal protein L6 GN=Rpl6                                 | H7C5Y5     |
| 60S ribosomal protein L7a (Fragment) GN=LOC100910109             | F1M013*    |
| 60S ribosomal protein L9 (Fragment) GN=RGD1561928                | F1M7A9*    |
| Ab1-114 GN=Slc25a15                                              | Q7TPA1     |
| Actin, alpha cardiac muscle 1 GN=Actc1                           | P68035     |
| Actin, cytoplasmic 1 GN=Actb                                     | P60711     |
| Acyl-CoA-binding protein (Fragment) GN=Dbi                       | MORDC5     |
| Adenosylhomocysteinase GN=Ahcyc                                  | P10760     |
| Alcohol dehydrogenase 1 GN=Adh1                                  | P06757     |
| Aldose reductase-related protein 1 GN=Akr1b7                     | Q5RJP0     |
| Alpha-enolase GN=Eno1                                            | P04764     |
| Apolipoprotein E GN=ApoE                                         | P02650     |
| Apoptosis-inducing factor 1, mitochondrial GN=Aifm1              | Q9JLM53    |
| Arginase-1 GN=Arg1                                               | P07824     |
| Argininosuccinate synthase GN=Ass1                               | P09034     |
| ATP synthase subunit b, mitochondrial GN=Atpsf1                  | P19511     |
| Betaine-homocysteine S-methyltransferase 1 GN=Bhmt               | O09171     |
| Biliverdin reductase B (Flavin reductase (NADPH)) GN=BlvrB       | B5DF65     |
| Calmodulin GN=Calm1                                              | P62161     |
| Carboxylesterase 1D GN=Ces1d                                     | P16303     |
| CaR-binding factor A GN=Hnrnpab                                  | Q9QX80     |
| Catechol O-methyltransferase GN=Comt                             | P22734     |
| Cathepsin B GN=Ctsb                                              | P00787     |
| CDGSH iron-sulfur domain-containing protein 1 GN=Cisd1           | B0K020     |
| Chaperonin containing Tcp1, subunit 6A (Zeta 1) GN=Cct6a         | Q3MHS9     |
| Cofilin-1 GN=Cfl1                                                | P45592     |
| Cytochrome b-c1 complex subunit 7 GN=Uqcrc                       | B2RYS2     |
| Cytochrome P450 2C12, female-specific GN=LOC100361492            | Q64648     |
| Cytosol aminopeptidase GN=Lap3                                   | Q68FS4     |
| Cytosolic 10-formyltetrahydrofolate dehydrogenase GN=Aldh11      | P28037     |
| D-dopachrome decarboxylase GN=Ddt                                | P80254     |
| Destrin GN=Dstn                                                  | Q7MOE3     |
| Elongation factor 1-alpha 1 GN=Eef1a1                            | P62630     |
| Elongation factor 1-delta GN=Eef1d                               | Q68FR9     |
| Elongation factor 2 GN=Eef2                                      | P05197     |
| Eukaryotic translation elongation factor 1 beta 2 GN=Eef1b2      | B5DEN5     |
| Fatty acid-binding protein, liver GN=Fabp1                       | P02692     |
| Filamin alpha GN=Flna                                            | C0JPT7     |
| Fructose-1,6-bisphosphatase 1 GN=Fbp1                            | P19112     |
| Fructose-bisphosphate aldolase GN=Aldob                          | Q66HT1     |
| Fructose-bisphosphate aldolase A GN=Aldoa                        | P05065     |
| Fumarylacetoacetase GN=Fah                                       | F1M6W1     |
| Glutathione S-transferase alpha-1 GN=Gsta1                       | P00502     |
| Glutathione S-transferase alpha-2 GN=Gsta2                       | P04903     |
| Glutathione S-transferase alpha-3 GN=Gsta3                       | P04904     |
| Glutathione S-transferase Mu 1 GN=Gstm1                          | P04905     |
| Glutathione S-transferase Mu 2 GN=Gstm2                          | P08010     |
| Glyceral-3-phosphate dehydrogenase [NAD(+)], cytoplasmic GN=Gpd1 | O35077     |
| Heat shock protein HSP 90-alpha GN=Hsp90aa1                      | B29295     |
| Heterogeneous nuclear ribonucleoprotein A3 GN=Hnrnpa3            | Q6URK4     |
| Heterogeneous nuclear ribonucleoproteins A2/B1 GN=Hnrnpa2b1      | F1LM82     |
| Hypoxanthine-guanine phosphoribosyltransferase GN=Hprt1          | P27605     |
| Keratin, type I cytoskeletal 18 GN=Krt18                         | Q5BJY9     |
| Keratin, type II cytoskeletal 8 GN=Krt8                          | Q10758     |
| Leucine-rich repeat-containing protein 59 GN=Lrrc59              | Q5RJR8     |
| Macrophage migration inhibitory factor GN=Mif                    | P39004     |
| Malate dehydrogenase, cytoplasmic GN=Mdh1                        | O88998     |
| Mitochondrial dicarboxylate carrier GN=Slc25a10                  | O89035     |
| Myosin regulatory light chain RLC-A GN=Rlc-a                     | P13832     |
| Myosin-14 GN=Myh14                                               | F1LNF0     |
| NADPH--cytochrome P450 reductase GN=Por                          | P00388     |
| Nucleophosmin GN=Npm1                                            | P13084     |
| Nucleoside diphosphate kinase B GN=Nme2                          | P19804     |
| PDZ and LIM domain protein 1 GN=Pdlim1                           | P52944     |
| Peptidyl-prolyl cis-trans isomerase A GN=Ppia                    | P10111     |
| Peroxiredoxin-1 GN=Prdx1                                         | Q63716     |
| Peroxiredoxin-5, mitochondrial (Fragment) GN=Prdx5               | D3ZEN5     |
| Peroxiredoxin-6 GN=Prdx6                                         | O35244     |
| Phosphate carrier protein, mitochondrial GN=Slc25a3              | G3V741     |
| Phosphatidylethanolamine-binding protein 1 GN=Pebp1              | P31044     |
| Phosphoglycerate kinase 1 GN=Pgk1                                | P16617     |
| Profilin-1 GN=Pfn1                                               | P62963     |
| Prostaglandin reductase 1 GN=Ptgr1                               | P97584     |
| Pyruvate kinase isozymes R/L GN=Pklr                             | P12928     |
| Rab GDP dissociation inhibitor beta GN=Gdi2                      | P50399     |
| Regucalcin GN=Rgn                                                | Q03336     |
| Ribonuclease UK114 GN=Hrsp12                                     | P52759     |
| Ribosomal protein S5, isoform CRA_b GN=Rps5                      | B0BN81     |
| S-adenosylmethionine synthase isoform type-1 GN=Mat1a            | P13444     |
| Selenium-binding protein 1 (Fragment) GN=Selenbp1                | F1LRJ9     |
| Serum albumin GN=Alb                                             | P02770     |
| Superoxide dismutase [Cu-Zn] GN=Sod1                             | P07632     |
| T-complex protein 1 subunit beta GN=Cct2                         | Q5XIM9     |
| T-complex protein 1 subunit gamma GN=Cct3                        | Q6P502     |
| Thioredoxin GN=Txn                                               | P11232     |
| Transgelin-2 GN=Tagln2                                           | Q5XFX0     |
| Transitional endoplasmic reticulum ATPase GN=Vcp                 | P46462     |
| Transketolase GN=Tkt                                             | P50137     |
| Triosephosphate isomerase GN=Tpi1                                | P48500     |
| Tropomyosin alpha-1 chain GN=Tpm1                                | P04692     |
| Tropomyosin alpha-3 chain GN=Tpm3                                | Q63610     |
| Tropomyosin alpha-4 chain GN=Tpm4                                | P09495     |

**Fig S1C. Protein list for the pair-wise comparison of 3DH vs. HM.** The original figure from the manuscript is shown (Fig. 3C). Protein UniProt Accessions with an asterisk (\*) were manually annotated by a BLAST search of the originally identified protein (See Fig. S1A for details).

|         | 3DHL_1A | 3DHL_1B | 3DHL_2A | 3DHL_2B | 3DHL_3A | 3DHL_3B | 3DH_1A | 3DH_1B | 3DH_2A | 3DH_2B | 3DH_3A | 3DH_3B | HM_1A  | HM_1B  | HM_2A  | HM_2B  | HM_3A  | HM_3B  |
|---------|---------|---------|---------|---------|---------|---------|--------|--------|--------|--------|--------|--------|--------|--------|--------|--------|--------|--------|
| 3DHL_1A | 1.0000  | 0.9986  | 0.9787  | 0.9800  | 0.9892  | 0.9928  | 0.9746 | 0.9755 | 0.9742 | 0.9755 | 0.9772 | 0.9774 | 0.9496 | 0.9466 | 0.9354 | 0.9398 | 0.9471 | 0.9424 |
| 3DHL_1B | 0.9986  | 1.0000  | 0.9788  | 0.9795  | 0.9902  | 0.9935  | 0.9760 | 0.9769 | 0.9748 | 0.9756 | 0.9784 | 0.9775 | 0.9481 | 0.9462 | 0.9353 | 0.9391 | 0.9450 | 0.9406 |
| 3DHL_2A | 0.9787  | 0.9788  | 1.0000  | 0.9988  | 0.9813  | 0.9788  | 0.9861 | 0.9864 | 0.9706 | 0.9732 | 0.9778 | 0.9772 | 0.9083 | 0.9065 | 0.8944 | 0.9023 | 0.8941 | 0.8908 |
| 3DHL_2B | 0.9800  | 0.9795  | 0.9988  | 1.0000  | 0.9808  | 0.9786  | 0.9863 | 0.9862 | 0.9711 | 0.9736 | 0.9778 | 0.9776 | 0.9105 | 0.9085 | 0.8965 | 0.9037 | 0.8957 | 0.8929 |
| 3DHL_3A | 0.9892  | 0.9902  | 0.9813  | 0.9808  | 1.0000  | 0.9982  | 0.9720 | 0.9730 | 0.9692 | 0.9731 | 0.9773 | 0.9763 | 0.9471 | 0.9473 | 0.9392 | 0.9438 | 0.9409 | 0.9375 |
| 3DHL_3B | 0.9928  | 0.9935  | 0.9788  | 0.9786  | 0.9982  | 1.0000  | 0.9716 | 0.9723 | 0.9704 | 0.9732 | 0.9773 | 0.9761 | 0.9497 | 0.9492 | 0.9401 | 0.9439 | 0.9460 | 0.9420 |
| 3DH_1A  | 0.9746  | 0.9760  | 0.9861  | 0.9863  | 0.9720  | 0.9716  | 1.0000 | 0.9986 | 0.9737 | 0.9753 | 0.9875 | 0.9872 | 0.8946 | 0.8936 | 0.8760 | 0.8828 | 0.8815 | 0.8754 |
| 3DH_1B  | 0.9755  | 0.9769  | 0.9864  | 0.9862  | 0.9730  | 0.9723  | 0.9986 | 1.0000 | 0.9750 | 0.9764 | 0.9887 | 0.9879 | 0.8966 | 0.8958 | 0.8786 | 0.8850 | 0.8823 | 0.8763 |
| 3DH_2A  | 0.9742  | 0.9748  | 0.9706  | 0.9711  | 0.9692  | 0.9704  | 0.9737 | 0.9750 | 1.0000 | 0.9983 | 0.9839 | 0.9848 | 0.9421 | 0.9416 | 0.9306 | 0.9343 | 0.9247 | 0.9181 |
| 3DH_2B  | 0.9755  | 0.9756  | 0.9732  | 0.9736  | 0.9731  | 0.9732  | 0.9753 | 0.9764 | 0.9983 | 1.0000 | 0.9848 | 0.9858 | 0.9432 | 0.9433 | 0.9319 | 0.9360 | 0.9262 | 0.9216 |
| 3DH_3A  | 0.9772  | 0.9784  | 0.9778  | 0.9778  | 0.9773  | 0.9773  | 0.9875 | 0.9887 | 0.9839 | 0.9848 | 1.0000 | 0.9982 | 0.9198 | 0.9198 | 0.9032 | 0.9084 | 0.9138 | 0.9088 |
| 3DH_3B  | 0.9774  | 0.9775  | 0.9772  | 0.9776  | 0.9763  | 0.9761  | 0.9872 | 0.9879 | 0.9848 | 0.9858 | 0.9982 | 1.0000 | 0.9222 | 0.9213 | 0.9049 | 0.9105 | 0.9157 | 0.9098 |
| HM_1A   | 0.9496  | 0.9481  | 0.9083  | 0.9105  | 0.9471  | 0.9497  | 0.8946 | 0.8966 | 0.9421 | 0.9432 | 0.9198 | 0.9222 | 1.0000 | 0.9987 | 0.9912 | 0.9924 | 0.9826 | 0.9788 |
| HM_1B   | 0.9466  | 0.9462  | 0.9065  | 0.9085  | 0.9473  | 0.9492  | 0.8936 | 0.8958 | 0.9416 | 0.9433 | 0.9198 | 0.9213 | 0.9987 | 1.0000 | 0.9925 | 0.9924 | 0.9807 | 0.9780 |
| HM_2A   | 0.9354  | 0.9353  | 0.8944  | 0.8965  | 0.9392  | 0.9401  | 0.8760 | 0.8786 | 0.9306 | 0.9319 | 0.9032 | 0.9049 | 0.9912 | 0.9925 | 1.0000 | 0.9982 | 0.9759 | 0.9721 |
| HM_2B   | 0.9398  | 0.9391  | 0.9023  | 0.9037  | 0.9438  | 0.9439  | 0.8828 | 0.8850 | 0.9343 | 0.9360 | 0.9084 | 0.9105 | 0.9924 | 0.9924 | 0.9982 | 1.0000 | 0.9778 | 0.9733 |
| HM_3A   | 0.9471  | 0.9450  | 0.8941  | 0.8957  | 0.9409  | 0.9460  | 0.8815 | 0.8823 | 0.9247 | 0.9262 | 0.9138 | 0.9157 | 0.9826 | 0.9807 | 0.9759 | 0.9778 | 1.0000 | 0.9953 |
| HM_3B   | 0.9424  | 0.9406  | 0.8908  | 0.8929  | 0.9375  | 0.9420  | 0.8754 | 0.8763 | 0.9181 | 0.9216 | 0.9088 | 0.9098 | 0.9788 | 0.9780 | 0.9721 | 0.9733 | 0.9953 | 1.0000 |

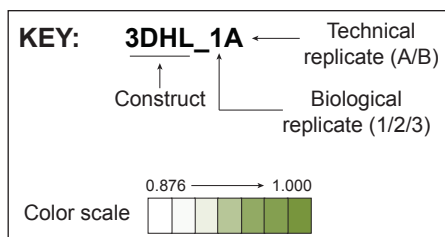

**Averaged Pearson Correlations Between Constructs**

|          |        |
|----------|--------|
| HM/3DHL  | 0.9291 |
| 3DHL/3DH | 0.9761 |
| HM/3DH   | 0.9103 |

**Averaged Pearson Correlations Between Replicates Within Constructs**

| Construct | Biological | Technical |
|-----------|------------|-----------|
| 3DHL      | 0.9835     | 0.9985    |
| 3DH       | 0.9826     | 0.9984    |
| HM        | 0.9823     | 0.9974    |

**Table S1. Pearson Coefficients Across Model Configurations and Replicates.** The first column and row indicate individual LC-MS runs organized by replicates. Biological replicates are separate constructs (in triplicate) and technical replicates are duplicate injections of the same sample (see Key). Averaged Pearson Correlations between constructs and replicates are shown to the right of the Key.

**Table S2:** DAVID Analysis of Enriched KEGG pathways. Terms exhibiting p-values less than 0.05 are shown. Arranged alphabetically according to the KEGG pathway. Multiple entries are for separate pairwise comparisons. p-values < 0.0001 (1.0E-04) are shown in bold. Pathways with over 200 proteins were excluded from the list.

| KEGG pathway                                 | KEGG ID  | Enrichment | Comparison | Proteins Annotated | Proteins in pathway | p-value         |
|----------------------------------------------|----------|------------|------------|--------------------|---------------------|-----------------|
| alpha-Linolenic acid metabolism              | Map00592 | 3DH        | 3DH vs HM  | 3                  | 25                  | 3.35E-02        |
| Arginine and proline metabolism              | Map00330 | 3DH        | 3DH vs HM  | 5                  | 51                  | 1.66E-03        |
| Arginine and proline metabolism              | Map00330 | 3DHL       | 3DHL vs HM | 4                  | 51                  | 2.21E-02        |
| Ascorbate and aldarate metabolism            | Map00053 | 3DHL       | 3DHL vs HM | 6                  | 27                  | <b>1.53E-05</b> |
| Ascorbate and aldarate metabolism            | Map00053 | 3DH        | 3DH vs HM  | 5                  | 27                  | 1.52E-04        |
| beta-Alanine metabolism                      | Map00410 | 3DH        | 3DH vs HM  | 6                  | 34                  | <b>1.56E-05</b> |
| beta-Alanine metabolism                      | Map00410 | 3DHL       | 3DHL vs HM | 6                  | 34                  | <b>4.62E-05</b> |
| Biosynthesis of amino acids                  | Map01230 | HM         | 3DHL vs HM | 11                 | 83                  | <b>3.28E-08</b> |
| Biosynthesis of amino acids                  | Map01230 | HM         | 3DH vs HM  | 11                 | 83                  | <b>3.76E-07</b> |
| Biosynthesis of amino acids                  | Map01230 | 3DH        | 3DH vs HM  | 5                  | 83                  | 7.45E-03        |
| Biosynthesis of unsaturated fatty acids      | Map01040 | 3DH        | 3DH vs HM  | 4                  | 29                  | 3.59E-03        |
| Biosynthesis of unsaturated fatty acids      | Map01040 | 3DHL       | 3DHL vs HM | 4                  | 29                  | 5.45E-03        |
| Butanoate metabolism                         | Map00650 | 3DHL       | 3DHL vs HM | 7                  | 28                  | <b>6.05E-07</b> |
| Butanoate metabolism                         | Map00650 | 3DH        | 3DH vs HM  | 6                  | 28                  | <b>7.56E-06</b> |
| Carbon metabolism                            | Map01200 | 3DHL       | 3DHL vs HM | 13                 | 121                 | <b>2.00E-09</b> |
| Carbon metabolism                            | Map01200 | HM         | 3DHL vs HM | 13                 | 121                 | <b>8.04E-09</b> |
| Carbon metabolism                            | Map01200 | HM         | 3DH vs HM  | 14                 | 121                 | <b>1.69E-08</b> |
| Carbon metabolism                            | Map01200 | 3DH        | 3DH vs HM  | 9                  | 121                 | <b>7.44E-06</b> |
| Chemical carcinogenesis                      | Map05204 | 3DHL       | 3DHL vs HM | 6                  | 91                  | 3.21E-03        |
| Chemical carcinogenesis                      | Map05204 | HM         | 3DH vs HM  | 7                  | 91                  | 5.21E-03        |
| Citrate cycle (TCA cycle)                    | Map00020 | 3DHL       | 3DHL vs HM | 5                  | 32                  | 5.77E-04        |
| Citrate cycle (TCA cycle)                    | Map00020 | HM         | 3DH vs HM  | 4                  | 32                  | 4.42E-02        |
| Drug metabolism - cytochrome P450            | Map00982 | 3DHL       | 3DHL vs HM | 5                  | 71                  | 8.13E-03        |
| Drug metabolism - cytochrome P450            | Map00982 | HM         | 3DH vs HM  | 6                  | 71                  | 9.20E-03        |
| Drug metabolism - cytochrome P450            | Map00982 | 3DH        | 3DH vs HM  | 4                  | 71                  | 3.42E-02        |
| Drug metabolism - other enzymes              | Map00983 | 3DHL       | 3DHL vs HM | 6                  | 56                  | 4.40E-04        |
| Fatty acid degradation                       | Map00071 | 3DHL       | 3DHL vs HM | 16                 | 47                  | <b>1.67E-19</b> |
| Fatty acid degradation                       | Map00071 | 3DH        | 3DH vs HM  | 13                 | 47                  | <b>4.00E-15</b> |
| Fatty acid elongation                        | Map00062 | 3DHL       | 3DHL vs HM | 5                  | 29                  | 4.44E-04        |
| Fatty acid metabolism                        | Map01212 | 3DHL       | 3DHL vs HM | 11                 | 54                  | <b>1.67E-10</b> |
| Fatty acid metabolism                        | Map01212 | 3DH        | 3DH vs HM  | 9                  | 54                  | <b>2.21E-08</b> |
| Fructose and mannose metabolism              | Map00051 | HM         | 3DH vs HM  | 5                  | 37                  | 7.46E-03        |
| Glutathione metabolism                       | Map00480 | HM         | 3DH vs HM  | 8                  | 58                  | <b>4.50E-05</b> |
| Glycine, serine and threonine metabolism     | Map00260 | 3DHL       | 3DHL vs HM | 6                  | 39                  | <b>8.55E-05</b> |
| Glycine, serine and threonine metabolism     | Map00260 | 3DH        | 3DH vs HM  | 4                  | 39                  | 7.69E-03        |
| Glycolysis / Gluconeogenesis                 | Map00010 | HM         | 3DHL vs HM | 11                 | 70                  | <b>9.71E-09</b> |
| Glycolysis / Gluconeogenesis                 | Map00010 | HM         | 3DH vs HM  | 8                  | 70                  | 1.39E-04        |
| Glyoxylate and dicarboxylate metabolism      | Map00630 | 3DH        | 3DH vs HM  | 4                  | 27                  | 3.26E-03        |
| Glyoxylate and dicarboxylate metabolism      | Map00630 | 3DHL       | 3DHL vs HM | 4                  | 27                  | 4.63E-03        |
| Histidine metabolism                         | Map00340 | 3DH        | 3DH vs HM  | 3                  | 24                  | 3.36E-02        |
| Lysine biosynthesis                          | Map00300 | 3DH        | 3DH vs HM  | 2                  | 2                   | 3.60E-02        |
| Lysine biosynthesis                          | Map00300 | 3DHL       | 3DHL vs HM | 2                  | 2                   | 4.05E-02        |
| Lysine degradation                           | Map00310 | 3DHL       | 3DHL vs HM | 10                 | 52                  | <b>2.38E-09</b> |
| Lysine degradation                           | Map00310 | 3DH        | 3DH vs HM  | 7                  | 52                  | <b>7.58E-06</b> |
| Metabolism of xenobiotics by cytochrome P450 | Map00980 | 3DHL       | 3DHL vs HM | 5                  | 70                  | 8.05E-03        |
| Metabolism of xenobiotics by cytochrome P450 | Map00980 | HM         | 3DH vs HM  | 6                  | 70                  | 9.41E-03        |
| Pentose and glucuronate interconversions     | Map00040 | 3DHL       | 3DHL vs HM | 5                  | 36                  | 8.68E-04        |
| Pentose and glucuronate interconversions     | Map00040 | 3DH        | 3DH vs HM  | 4                  | 36                  | 6.42E-03        |
| Pentose phosphate pathway                    | Map00030 | HM         | 3DHL vs HM | 7                  | 29                  | <b>2.31E-06</b> |
| Pentose phosphate pathway                    | Map00030 | HM         | 3DH vs HM  | 6                  | 29                  | 1.78E-04        |
| Peroxisome                                   | Map04146 | 3DHL       | 3DHL vs HM | 14                 | 85                  | <b>1.75E-12</b> |
| Peroxisome                                   | Map04146 | 3DH        | 3DH vs HM  | 13                 | 85                  | <b>2.67E-12</b> |
| Porphyryn and chlorophyll metabolism         | Map00860 | 3DHL       | 3DHL vs HM | 4                  | 41                  | 1.30E-02        |
| PPAR signaling pathway                       | Map03320 | 3DH        | 3DH vs HM  | 8                  | 77                  | <b>5.86E-06</b> |
| PPAR signaling pathway                       | Map03320 | 3DHL       | 3DHL vs HM | 6                  | 77                  | 1.57E-03        |
| Primary bile acid biosynthesis               | Map00120 | 3DH        | 3DH vs HM  | 4                  | 16                  | 7.52E-04        |
| Primary bile acid biosynthesis               | Map00120 | 3DHL       | 3DHL vs HM | 4                  | 16                  | 1.11E-03        |

|                                             |          |      |             |    |     |                 |
|---------------------------------------------|----------|------|-------------|----|-----|-----------------|
| Propanoate metabolism                       | Map00640 | 3DHL | 3DHL vs HM  | 7  | 28  | <b>6.05E-07</b> |
| Propanoate metabolism                       | Map00640 | 3DH  | 3DH vs HM   | 4  | 28  | 3.42E-03        |
| Protein processing in endoplasmic reticulum | Map04141 | 3DHL | 3DHL vs 3DH | 5  | 168 | 5.34E-04        |
| Pyruvate metabolism                         | Map00620 | 3DH  | 3DH vs HM   | 4  | 40  | 7.52E-03        |
| Retinol metabolism                          | Map00830 | 3DHL | 3DHL vs HM  | 5  | 83  | 1.32E-02        |
| Retinol metabolism                          | Map00830 | 3DHL | 3DHL vs 3DH | 3  | 83  | 2.79E-02        |
| Ribosome                                    | Map03010 | HM   | 3DHL vs HM  | 18 | 172 | <b>3.68E-12</b> |
| Ribosome                                    | Map03010 | HM   | 3DH vs HM   | 15 | 172 | <b>8.88E-08</b> |
| Thyroid hormone synthesis                   | Map04918 | 3DHL | 3DHL vs 3DH | 3  | 68  | 2.83E-02        |
| Tryptophan metabolism                       | Map00380 | 3DHL | 3DHL vs HM  | 10 | 46  | <b>9.52E-10</b> |
| Tryptophan metabolism                       | Map00380 | 3DH  | 3DH vs HM   | 7  | 46  | <b>5.13E-06</b> |
| Valine, leucine and isoleucine degradation  | Map00280 | 3DHL | 3DHL vs HM  | 17 | 55  | <b>6.12E-20</b> |
| Valine, leucine and isoleucine degradation  | Map00280 | 3DH  | 3DH vs HM   | 13 | 55  | <b>1.58E-14</b> |

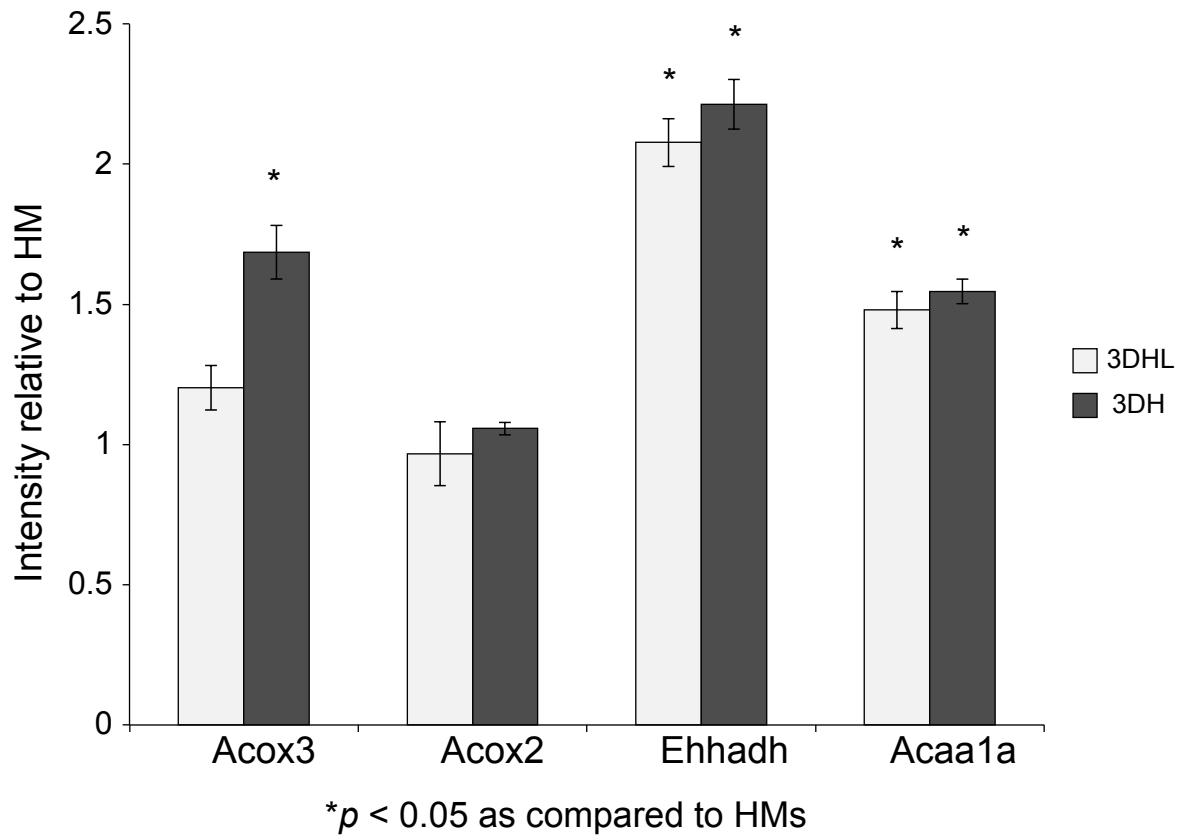

**Fig S2. Peroxisomal processes are modulated by PEMs and LSECs.** Relative protein abundance ratios based on the Top3 ion intensities for enzymes associated with peroxisomal fatty acid  $\beta$ -oxidation that change significantly based upon the culture conditions (\*  $p < 0.05$  as compared to HMs).
